# Supplementary material for: The high piezoelectricity and thermal stability of high-temperature piezoelectric ceramics BiFeO3–0.25BaTiO3–xBi0.5K0.5TiO3 near the MPB
Source: Royal Society of Chemistry journal article supplement (doi:10.1039/d2tc00590e), 2022-01-01
Supplement: d2tc00590e1.pdf [file d2tc00590e1.pdf]

## Supporting Information

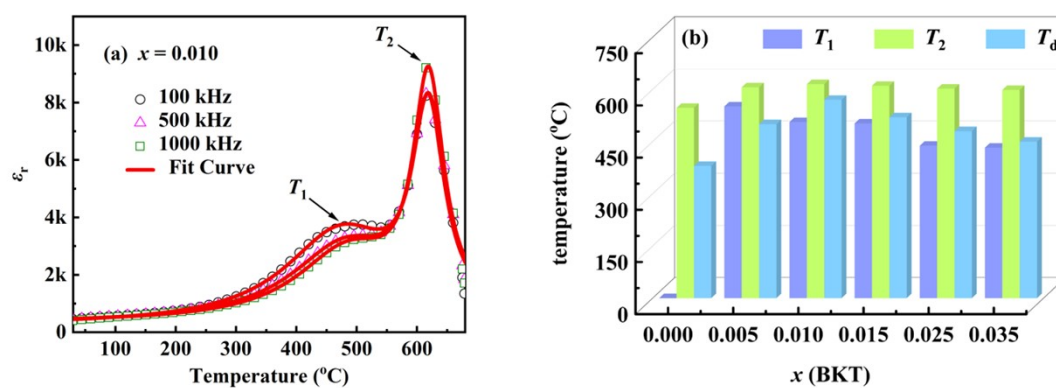

**Fig. S1** (a) Temperature dependence of dielectric permittivity ( $\epsilon_r$ ) for BF-BT-0.010BKT ceramics as a function of frequency; (b) variations of phase transition temperatures ( $T_2$ ), Dielectric anomaly ( $T_1$ ) and  $T_d$  for the BF-BT-  $x$ BKT.
